# Supplementary material
Source: publisher site journal article supplement (https://www.dovepress.com/article/593382)
Supplement: Supplementary file 1 [file 593382%20Supplementary%20Material.pdf]

**Supplementary Figure S1. Impact of different biologic therapies on patients' preferences.**

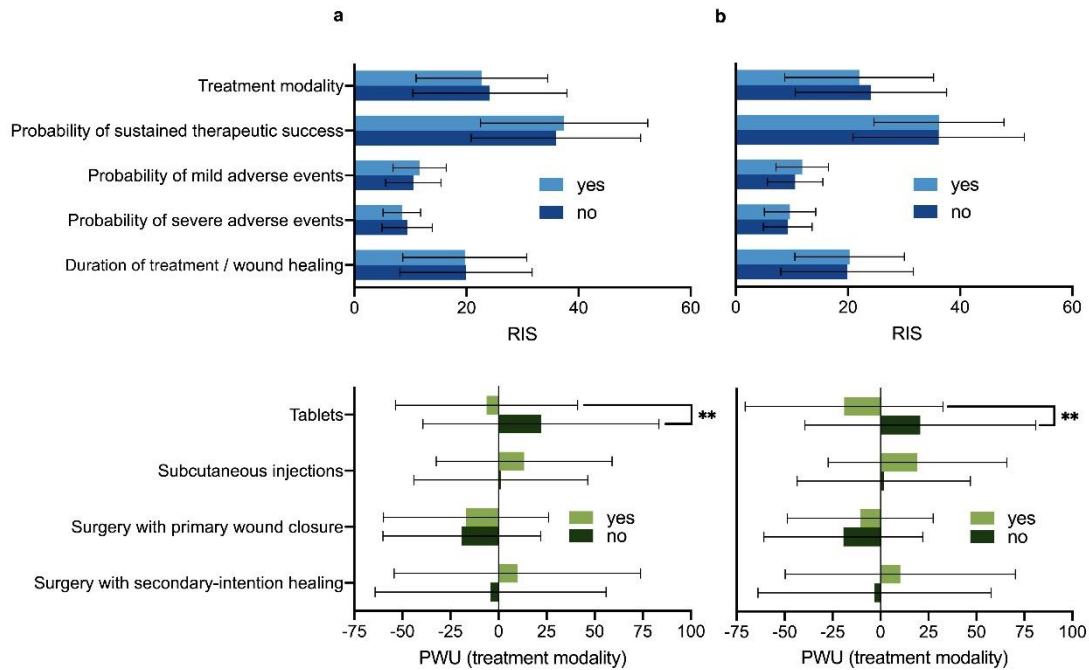

(a) Treatment experience with Adalimumab. Patients experienced with adalimumab were less interested in receiving tablets than those without this experience (PWU: -6.3, SD: 47.3 vs. PWU: 22.1, SD: 61.4,  $p=0.017$ ). (b) Treatment experience with other biologics. The same preference pattern was found for patients experienced with any other biologic (i.e., certolizumab pegol ( $n=1$ ), etanercept ( $n=1$ ), golimumab ( $n=1$ ), infliximab ( $n=6$ ), secukinumab ( $n=2$ ), vedolizumab ( $n=1$ ), and biologics that could not be specified ( $n=8$ )), compared to patients naïve to these agents (PWU: -19.0, SD: 51.6 vs. PWU: 20.7, SD: 60.2,  $p=0.014$ ). \*\*  $p<0.01$ . Bars: Means with standard deviations. RIS: Relative Importance Score; PWU: Part-worth utility; SD: Standard deviation.
